# Supplementary material for: A variant in CDKAL1 influences insulin response and risk of type 2 diabetes
Source: Springer Nature journal article supplement (doi:10.1038/ng2043), 2007-04-26
Supplement: 41588_2007_BFng2043_MOESM65_ESM.pdf [file 41588_2007_BFng2043_MOESM65_ESM.pdf]

### Supplementary Table 1: Association to T2D in the Icelandic discovery group.

The upper table includes association results for all SNPs or two-marker haplotypes that have an adjusted  $P$  value less than  $5 \times 10^{-5}$  for either all T2D cases, non-obese T2D cases or obese T2D cases. Included in the table is the chromosome, the position of the markers (or the midpoint for two-marker haplotypes) in NCBI Build 34, the markers and alleles tested, the corresponding surrogate SNP for two-markers haplotypes selected for replication, the frequency in controls and the frequency in cases, the odds ratio (OR) and adjusted  $P$  value for the three case groups tested. The number of T2D cases in each of the three groups is included in parenthesis and the same set of 5275 controls is used in all tests. Note that information on BMI is missing for 168 of the cases. The lower table includes the corresponding values for the five most significant non-synonymous SNPs selected for replication. Included in column five are the corresponding genes and the codon changes. In both tables markers selected for further testing in the first replication group (Denmark B) are indicated with bold typesetting. Other markers / haplotypes were excluded from the replication study as they were a) highly correlated with another marker selected for replication, or b) belong to the *TCF7L2* locus that has been studied previously. The correlation ( $r^2$ ) between surrogate haplotypes and the SNP they tag is estimated based on the HapMap CEU dataset.

| Chr | Position  | Markers               | Allele | Surrogate <sup>a</sup> ( $r^2$ ) | Con.frq | All T2D cases (1399) |      |           | NonObese T2D cases (700) |      |           | Obese T2D cases (531) |      |          |
|-----|-----------|-----------------------|--------|----------------------------------|---------|----------------------|------|-----------|--------------------------|------|-----------|-----------------------|------|----------|
|     |           |                       |        |                                  |         | Case.frq             | OR   | $P^b$     | Case.frq                 | OR   | $P^b$     | Case.frq              | OR   | $P^b$    |
| C01 | 29602516  | rs4949283 rs502545    | TC     | <b>rs10798895</b> G (1)          | 0.149   | 0.117                | 0.76 | 0.00016   | 0.104                    | 0.66 | 0.000033  | 0.133                 | 0.88 | 0.21     |
| C01 | 104461151 | <b>rs7553985</b>      | C      | -                                | 0.394   | 0.430                | 1.16 | 0.0023    | 0.419                    | 1.11 | 0.11      | 0.466                 | 1.34 | 0.000027 |
| C01 | 104467009 | rs2166890             | T      | -                                | 0.393   | 0.430                | 1.16 | 0.0018    | 0.419                    | 1.11 | 0.091     | 0.466                 | 1.35 | 0.000024 |
| C01 | 104468502 | rs7552405             | T      | -                                | 0.317   | 0.355                | 1.19 | 0.00078   | 0.346                    | 1.14 | 0.047     | 0.386                 | 1.35 | 0.000030 |
| C01 | 151915609 | <b>rs3738028</b>      | G      | -                                | 0.360   | 0.407                | 1.22 | 0.000046  | 0.417                    | 1.27 | 0.00016   | 0.409                 | 1.23 | 0.0038   |
| C02 | 40632580  | rs13414307 rs1990609  | AG     | -                                | 0.517   | 0.571                | 1.24 | 0.0000089 | 0.568                    | 1.23 | 0.0011    | 0.582                 | 1.30 | 0.00026  |
| C02 | 40623619  | <b>rs13414307</b>     | A      | -                                | 0.543   | 0.593                | 1.22 | 0.000033  | 0.589                    | 1.21 | 0.0028    | 0.603                 | 1.28 | 0.00056  |
| C02 | 55036788  | rs930493 rs10173697   | GT     | -                                | 0.281   | 0.335                | 1.29 | 0.0000017 | 0.325                    | 1.23 | 0.0024    | 0.333                 | 1.27 | 0.0016   |
| C02 | 55040844  | rs10173697            | T      | -                                | 0.503   | 0.553                | 1.22 | 0.000040  | 0.545                    | 1.18 | 0.0086    | 0.560                 | 1.25 | 0.0014   |
| C03 | 89162181  | <b>rs12486049</b>     | T      | -                                | 0.872   | 0.904                | 1.38 | 0.000035  | 0.907                    | 1.43 | 0.00043   | 0.901                 | 1.34 | 0.0095   |
| C03 | 146863467 | <b>rs7630694</b>      | G      | -                                | 0.060   | 0.070                | 1.20 | 0.065     | 0.056                    | 0.93 | 0.60      | 0.097                 | 1.70 | 0.000033 |
| C03 | 196904151 | <b>rs9858622</b>      | A      | -                                | 0.668   | 0.701                | 1.17 | 0.0028    | 0.682                    | 1.07 | 0.34      | 0.737                 | 1.40 | 0.000016 |
| C04 | 140508134 | rs13116075 rs6824182  | AA     | <b>rs10033117</b> C (1)          | 0.741   | 0.763                | 1.13 | 0.036     | 0.734                    | 0.96 | 0.60      | 0.804                 | 1.43 | 0.000024 |
| C04 | 140604420 | rs2292837 rs11725721  | TC     | -                                | 0.254   | 0.232                | 0.89 | 0.038     | 0.259                    | 1.03 | 0.69      | 0.194                 | 0.71 | 0.000047 |
| C04 | 140621178 | rs3762864 rs11725721  | GC     | -                                | 0.254   | 0.233                | 0.89 | 0.042     | 0.262                    | 1.04 | 0.60      | 0.194                 | 0.70 | 0.000038 |
| C05 | 76637396  | rs832785 rs2859576    | AA     | -                                | 0.510   | 0.470                | 0.85 | 0.00082   | 0.489                    | 0.92 | 0.18      | 0.438                 | 0.75 | 0.000043 |
| C05 | 76635083  | <b>rs4704400</b>      | T      | -                                | 0.490   | 0.530                | 1.18 | 0.0008    | 0.511                    | 1.09 | 0.18      | 0.562                 | 1.33 | 0.000043 |
| C05 | 87882885  | rs10505855 rs12514611 | GC     | <b>rs10452479</b> G<br>(0.94)    | 0.188   | 0.224                | 1.25 | 0.00023   | 0.244                    | 1.39 | 0.000015  | 0.200                 | 1.08 | 0.38     |
| C06 | 6967990   | rs490213 rs814174     | AG     | <b>rs12201780</b> A (1)          | 0.044   | 0.072                | 1.71 | 0.000016  | 0.080                    | 1.89 | 0.000037  | 0.063                 | 1.48 | 0.033    |
| C06 | 9509965   | <b>rs214447</b>       | T      | -                                | 0.424   | 0.449                | 1.11 | 0.034     | 0.416                    | 0.97 | 0.61      | 0.495                 | 1.34 | 0.000035 |
| C06 | 20779501  | rs4712527 rs7756992   | AG     | -                                | 0.232   | 0.270                | 1.23 | 0.00021   | 0.292                    | 1.37 | 0.0000090 | 0.250                 | 1.11 | 0.21     |
| C06 | 20805960  | rs7756992 rs9295478   | AG     | -                                | 0.743   | 0.701                | 0.81 | 0.000089  | 0.682                    | 0.74 | 0.000013  | 0.718                 | 0.88 | 0.11     |

|     |           |                       |    |                            |       |       |      |                      |       |      |           |       |      |           |
|-----|-----------|-----------------------|----|----------------------------|-------|-------|------|----------------------|-------|------|-----------|-------|------|-----------|
| C06 | 20787688  | <b>rs7756992</b>      | G  | -                          | 0.232 | 0.270 | 1.23 | 0.00021              | 0.292 | 1.37 | 0.0000090 | 0.250 | 1.11 | 0.20      |
| C06 | 31552682  | <b>rs2516424</b>      | C  | -                          | 0.325 | 0.372 | 1.23 | 0.000039             | 0.375 | 1.25 | 0.00080   | 0.376 | 1.25 | 0.0020    |
| C06 | 31592562  | rs2516424 rs4947324   | CC | -                          | 0.320 | 0.368 | 1.24 | 0.000027             | 0.370 | 1.25 | 0.00074   | 0.373 | 1.26 | 0.0016    |
| C06 | 41130207  | <b>rs10456499</b>     | A  | -                          | 0.563 | 0.597 | 1.15 | 0.0040               | 0.575 | 1.05 | 0.43      | 0.637 | 1.36 | 0.000018  |
| C06 | 132387934 | rs9483377 rs997607    | GC | -                          | 0.234 | 0.278 | 1.26 | 0.000040             | 0.272 | 1.22 | 0.0067    | 0.276 | 1.25 | 0.0065    |
| C06 | 132379686 | rs9483377 rs7745875   | GG | -                          | 0.233 | 0.276 | 1.25 | 0.000048             | 0.271 | 1.22 | 0.0052    | 0.273 | 1.23 | 0.0087    |
| C06 | 132361238 | <b>rs9483377</b>      | G  | -                          | 0.307 | 0.356 | 1.25 | 0.000013             | 0.348 | 1.20 | 0.0052    | 0.354 | 1.24 | 0.0040    |
| C06 | 150399255 | <b>rs11155700</b>     | A  | -                          | 0.749 | 0.794 | 1.29 | 0.0000095            | 0.786 | 1.23 | 0.0049    | 0.801 | 1.35 | 0.00039   |
| C06 | 150399954 | rs12213837            | C  | -                          | 0.749 | 0.794 | 1.29 | 0.0000097            | 0.786 | 1.23 | 0.0049    | 0.801 | 1.35 | 0.00040   |
| C06 | 164421443 | rs206732 rs933251     | TC | <b>rs10085202 A (1)</b>    | 0.531 | 0.479 | 0.81 | 0.000037             | 0.469 | 0.78 | 0.00015   | 0.497 | 0.87 | 0.058     |
| C08 | 124084183 | <b>rs952656</b>       | G  | -                          | 0.673 | 0.721 | 1.25 | 0.000019             | 0.706 | 1.17 | 0.021     | 0.725 | 1.28 | 0.0012    |
| C08 | 124092339 | rs13252935 rs7824293  | TG | -                          | 0.143 | 0.108 | 0.72 | 0.000010             | 0.116 | 0.78 | 0.0099    | 0.104 | 0.69 | 0.00067   |
| C08 | 128249239 | rs283710 rs412835     | CC | -                          | 0.254 | 0.222 | 0.84 | 0.0024               | 0.245 | 0.95 | 0.51      | 0.190 | 0.69 | 0.000025  |
| C08 | 128250055 | <b>rs185852</b>       | G  | -                          | 0.755 | 0.791 | 1.22 | 0.000050             | 0.764 | 1.05 | 0.49      | 0.822 | 1.49 | 0.0000046 |
| C08 | 128265112 | rs283718 rs283720     | CA | -                          | 0.255 | 0.223 | 0.84 | 0.0026               | 0.256 | 1.01 | 0.94      | 0.189 | 0.68 | 0.0000092 |
| C09 | 88426790  | <b>rs10993008</b>     | A  | -                          | 0.154 | 0.192 | 1.30 | 0.000027             | 0.181 | 1.21 | 0.019     | 0.194 | 1.32 | 0.0020    |
| C09 | 93768899  | rs10818991 rs10990303 | CC | <b>rs10985640 A (0.85)</b> | 0.537 | 0.490 | 0.83 | 0.00019              | 0.469 | 0.76 | 0.000037  | 0.513 | 0.91 | 0.18      |
| C09 | 93802193  | rs10990568 rs4743148  | GG | -                          | 0.263 | 0.309 | 1.25 | 0.000032             | 0.314 | 1.28 | 0.00038   | 0.306 | 1.23 | 0.0076    |
| C09 | 93810412  | <b>rs4743148</b>      | G  | -                          | 0.315 | 0.365 | 1.25 | 0.000010             | 0.371 | 1.28 | 0.00013   | 0.358 | 1.21 | 0.0092    |
| C09 | 124790974 | <b>rs3814120</b>      | T  | -                          | 0.093 | 0.113 | 1.25 | 0.0046               | 0.094 | 1.01 | 0.91      | 0.140 | 1.59 | 0.000014  |
| C10 | 52735263  | rs7915186 rs3829170   | TT | -                          | 0.328 | 0.377 | 1.24 | 0.000021             | 0.374 | 1.22 | 0.0021    | 0.375 | 1.23 | 0.0049    |
| C10 | 52746400  | rs3829170 rs7922112   | TG | <b>rs12247188 T (0.9)</b>  | 0.336 | 0.386 | 1.24 | 0.000021             | 0.381 | 1.22 | 0.0027    | 0.387 | 1.24 | 0.0027    |
| C10 | 93976392  | rs2421943             | G  | -                          | 0.555 | 0.614 | 1.28 | $9.1 \times 10^{-7}$ | 0.600 | 1.20 | 0.0043    | 0.621 | 1.31 | 0.00017   |
| C10 | 94022896  | rs2421943 rs7917359   | GC | -                          | 0.521 | 0.585 | 1.30 | $1.3 \times 10^{-8}$ | 0.565 | 1.19 | 0.0052    | 0.602 | 1.39 | 0.0000041 |
| C10 | 94068337  | rs7908111 rs2497304   | GG | -                          | 0.499 | 0.443 | 0.80 | 0.0000034            | 0.456 | 0.84 | 0.0072    | 0.427 | 0.75 | 0.000039  |
| C10 | 94011761  | rs1999763 rs10882091  | GT | -                          | 0.517 | 0.455 | 0.78 | $2.9 \times 10^{-7}$ | 0.472 | 0.83 | 0.0038    | 0.442 | 0.74 | 0.000019  |
| C10 | 94023632  | rs1999763 rs6583830   | GG | -                          | 0.517 | 0.455 | 0.78 | $2.9 \times 10^{-7}$ | 0.472 | 0.83 | 0.0038    | 0.442 | 0.74 | 0.000019  |
| C10 | 94012407  | rs6583826             | G  | -                          | 0.467 | 0.518 | 1.23 | 0.000020             | 0.508 | 1.18 | 0.0080    | 0.527 | 1.28 | 0.00048   |
| C10 | 94025680  | rs6583826 rs10882091  | GC | -                          | 0.393 | 0.449 | 1.26 | 0.0000021            | 0.435 | 1.19 | 0.0062    | 0.469 | 1.36 | 0.000012  |
| C10 | 94092724  | rs10882091 rs7923837  | CG | -                          | 0.410 | 0.466 | 1.26 | 0.0000022            | 0.452 | 1.19 | 0.0063    | 0.486 | 1.36 | 0.000011  |
| C10 | 94038954  | rs10882091            | C  | -                          | 0.415 | 0.472 | 1.26 | 0.0000024            | 0.456 | 1.18 | 0.0079    | 0.491 | 1.36 | 0.000014  |
| C10 | 94047527  | <b>rs7914814</b>      | T  | -                          | 0.416 | 0.472 | 1.26 | 0.0000025            | 0.456 | 1.18 | 0.0081    | 0.491 | 1.35 | 0.000014  |
| C10 | 94062695  | rs6583830             | A  | -                          | 0.415 | 0.472 | 1.26 | 0.0000024            | 0.456 | 1.18 | 0.0079    | 0.491 | 1.36 | 0.000014  |
| C10 | 94122233  | rs2275729 rs1111875   | AG | -                          | 0.470 | 0.527 | 1.26 | 0.0000023            | 0.519 | 1.22 | 0.0018    | 0.534 | 1.29 | 0.00025   |
| C10 | 94157293  | rs2497304             | A  | -                          | 0.530 | 0.473 | 0.80 | 0.0000               | 0.481 | 0.82 | 0.00      | 0.466 | 0.77 | 0.000251  |

|     |           |                            |    |                          |       |       |      |                       |       |      |                       |       |      |          |
|-----|-----------|----------------------------|----|--------------------------|-------|-------|------|-----------------------|-------|------|-----------------------|-------|------|----------|
| C10 | 94160330  | rs947591                   | A  | -                        | 0.475 | 0.526 | 1.23 | 0.000023              | 0.521 | 1.21 | 0.0028                | 0.545 | 1.33 | 0.000053 |
| C10 | 114441018 | rs7895307 rs12255372       | GT | -                        | 0.257 | 0.308 | 1.29 | 0.0000049             | 0.330 | 1.42 | 4.5×10 <sup>-7</sup>  | 0.269 | 1.06 | 0.45     |
| C10 | 114422936 | rs7903146                  | T  | -                        | 0.300 | 0.372 | 1.38 | 1.8×10 <sup>-10</sup> | 0.396 | 1.53 | 2.4×10 <sup>-11</sup> | 0.342 | 1.21 | 0.010    |
| C10 | 114434905 | rs7903146 rs11196192       | TT | -                        | 0.220 | 0.282 | 1.39 | 3.4×10 <sup>-9</sup>  | 0.298 | 1.51 | 9.4×10 <sup>-9</sup>  | 0.263 | 1.27 | 0.0042   |
| C10 | 114438514 | rs7904519                  | G  | -                        | 0.480 | 0.522 | 1.18 | 0.00045               | 0.553 | 1.34 | 0.0000026             | 0.483 | 1.01 | 0.84     |
| C10 | 114455586 | rs7904519 rs10885409       | GC | -                        | 0.474 | 0.516 | 1.18 | 0.00055               | 0.549 | 1.35 | 0.0000018             | 0.476 | 1.01 | 0.90     |
| C10 | 114455586 | rs7904519 rs10885409       | AT | -                        | 0.510 | 0.471 | 0.86 | 0.0013                | 0.441 | 0.76 | 0.000011              | 0.510 | 1.00 | 0.99     |
| C10 | 114472659 | rs10885409                 | C  | -                        | 0.484 | 0.523 | 1.17 | 0.0014                | 0.555 | 1.33 | 0.0000060             | 0.483 | 0.99 | 0.94     |
| C10 | 114473489 | rs12255372                 | T  | -                        | 0.294 | 0.351 | 1.29 | 4.9×10 <sup>-7</sup>  | 0.371 | 1.41 | 1.6×10 <sup>-7</sup>  | 0.317 | 1.11 | 0.15     |
| C10 | 118261345 | rs1681748 rs2170862        | TT | -                        | 0.238 | 0.265 | 1.15 | 0.013                 | 0.245 | 1.04 | 0.59                  | 0.302 | 1.38 | 0.000041 |
| C10 | 118285583 | rs2170862                  | T  | -                        | 0.256 | 0.281 | 1.13 | 0.020                 | 0.259 | 1.02 | 0.82                  | 0.320 | 1.37 | 0.000043 |
| C10 | 118555280 | <b>rs10787760</b>          | G  | -                        | 0.278 | 0.300 | 1.12 | 0.037                 | 0.269 | 0.96 | 0.53                  | 0.347 | 1.38 | 0.000017 |
| C11 | 23946882  | <b>rs1879230</b>           | T  | -                        | 0.088 | 0.111 | 1.30 | 0.00097               | 0.128 | 1.53 | 0.000021              | 0.093 | 1.07 | 0.57     |
| C11 | 106474406 | <b>rs1455593</b>           | T  | -                        | 0.097 | 0.114 | 1.20 | 0.021                 | 0.087 | 0.89 | 0.29                  | 0.142 | 1.54 | 0.000040 |
| C12 | 30390375  | rs1429622 rs1506382        | AG | <b>rs794598 C (0.9)</b>  | 0.368 | 0.321 | 0.82 | 0.000083              | 0.341 | 0.89 | 0.092                 | 0.296 | 0.72 | 0.000023 |
| C12 | 33373479  | <b>rs1905421</b>           | T  | -                        | 0.082 | 0.110 | 1.39 | 0.000044              | 0.116 | 1.47 | 0.00020               | 0.107 | 1.35 | 0.011    |
| C13 | 25558690  | rs565707 rs6491198         | AA | -                        | 0.281 | 0.249 | 0.85 | 0.0039                | 0.220 | 0.72 | 0.000016              | 0.274 | 0.97 | 0.69     |
| C13 | 25478564  | <b>rs565707</b>            | C  | -                        | 0.700 | 0.734 | 1.19 | 0.0016                | 0.763 | 1.38 | 0.0000073             | 0.710 | 1.05 | 0.53     |
| C13 | 25535031  | rs7984685                  | C  | -                        | 0.540 | 0.582 | 1.19 | 0.00043               | 0.606 | 1.31 | 0.000022              | 0.568 | 1.12 | 0.11     |
| C13 | 25537643  | rs7998347                  | C  | -                        | 0.540 | 0.582 | 1.19 | 0.00046               | 0.606 | 1.31 | 0.000024              | 0.568 | 1.12 | 0.11     |
| C13 | 25715179  | rs1333350 rs7987436        | GT | -                        | 0.254 | 0.216 | 0.81 | 0.00030               | 0.195 | 0.71 | 0.000010              | 0.251 | 0.98 | 0.82     |
| C14 | 80759910  | rs799099 rs4899801         | AG | -                        | 0.365 | 0.390 | 1.11 | 0.037                 | 0.359 | 0.97 | 0.64                  | 0.439 | 1.36 | 0.000022 |
| C14 | 80763881  | <b>rs2066041</b>           | G  | -                        | 0.367 | 0.394 | 1.12 | 0.021                 | 0.368 | 1.01 | 0.92                  | 0.437 | 1.34 | 0.000038 |
| C14 | 80820260  | rs10483957                 | A  | -                        | 0.459 | 0.493 | 1.15 | 0.0042                | 0.476 | 1.07 | 0.28                  | 0.530 | 1.33 | 0.000042 |
| C15 | 98094991  | rs9920347 rs11635811       | AG | <b>rs2045107 C (0.9)</b> | 0.521 | 0.469 | 0.81 | 0.000044              | 0.475 | 0.84 | 0.0056                | 0.468 | 0.81 | 0.0041   |
| C16 | 12811478  | <b>rs6498353</b> rs9941146 | CG | -                        | 0.105 | 0.080 | 0.74 | 0.00054               | 0.068 | 0.62 | 0.000047              | 0.082 | 0.75 | 0.026    |
| C16 | 22764405  | <b>rs724466</b>            | T  | -                        | 0.738 | 0.781 | 1.26 | 0.000038              | 0.781 | 1.27 | 0.0012                | 0.783 | 1.29 | 0.0025   |
| C16 | 24353768  | rs11074618 rs985729        | AC | <b>rs11644596 G (1)</b>  | 0.299 | 0.342 | 1.21 | 0.00044               | 0.332 | 1.16 | 0.040                 | 0.372 | 1.39 | 0.000032 |
| C16 | 73296557  | rs1862773 rs825842         | CT | -                        | 0.059 | 0.038 | 0.63 | 0.000048              | 0.041 | 0.67 | 0.0075                | 0.039 | 0.64 | 0.0072   |
| C16 | 73311680  | rs2432543 <b>rs4887826</b> | TG | -                        | 0.069 | 0.043 | 0.61 | 0.000010              | 0.042 | 0.60 | 0.00046               | 0.049 | 0.69 | 0.019    |
| C17 | 69180675  | rs17763769 rs1860316       | GA | -                        | 0.511 | 0.564 | 1.24 | 0.000013              | 0.585 | 1.35 | 0.0000023             | 0.543 | 1.14 | 0.069    |
| C17 | 69203439  | <b>rs1860316</b>           | A  | -                        | 0.653 | 0.707 | 1.28 | 0.0000020             | 0.734 | 1.46 | 3.2×10 <sup>-8</sup>  | 0.687 | 1.17 | 0.039    |
| C17 | 69242752  | rs1860316 rs17763811       | GC | -                        | 0.335 | 0.282 | 0.78 | 0.0000028             | 0.254 | 0.68 | 2.6×10 <sup>-8</sup>  | 0.301 | 0.86 | 0.039    |
| C17 | 69218316  | rs1981647                  | C  | -                        | 0.513 | 0.563 | 1.23 | 0.000026              | 0.583 | 1.33 | 0.0000065             | 0.544 | 1.14 | 0.071    |
| C17 | 69234630  | rs1843622                  | T  | -                        | 0.615 | 0.665 | 1.24 | 0.000021              | 0.684 | 1.35 | 0.0000043             | 0.640 | 1.11 | 0.14     |

|     |          |                     |    |                        |       |       |      |           |       |      |                      |       |      |        |
|-----|----------|---------------------|----|------------------------|-------|-------|------|-----------|-------|------|----------------------|-------|------|--------|
| C17 | 69244944 | rs2191113           | A  | -                      | 0.696 | 0.744 | 1.27 | 0.000013  | 0.771 | 1.47 | 9.5×10 <sup>-8</sup> | 0.713 | 1.08 | 0.30   |
| C17 | 69259003 | rs9890889           | A  | -                      | 0.839 | 0.869 | 1.27 | 0.00053   | 0.885 | 1.47 | 0.000032             | 0.857 | 1.14 | 0.17   |
| C18 | 41051796 | <b>rs10502860</b>   | G  | -                      | 0.167 | 0.194 | 1.20 | 0.0035    | 0.218 | 1.39 | 0.000028             | 0.174 | 1.05 | 0.61   |
| C18 | 63451377 | rs764133 rs7237209  | TT | -                      | 0.167 | 0.132 | 0.76 | 0.00010   | 0.121 | 0.69 | 0.000048             | 0.135 | 0.78 | 0.014  |
| C18 | 63463071 | <b>rs7237209</b>    | C  | -                      | 0.819 | 0.852 | 1.27 | 0.00028   | 0.867 | 1.44 | 0.000029             | 0.847 | 1.22 | 0.037  |
| C19 | 3316583  | <b>rs3810420</b>    | A  | -                      | 0.176 | 0.189 | 1.09 | 0.16      | 0.227 | 1.37 | 0.000045             | 0.146 | 0.80 | 0.021  |
| C20 | 37651862 | rs4592915 rs2232580 | GC | <b>rs6127771</b> C (1) | 0.495 | 0.550 | 1.25 | 0.0000048 | 0.558 | 1.29 | 0.000051             | 0.543 | 1.21 | 0.0060 |
| C21 | 13769165 | <b>rs468601</b>     | A  | -                      | 0.888 | 0.908 | 1.25 | 0.0054    | 0.927 | 1.60 | 0.000026             | 0.895 | 1.08 | 0.48   |
| C21 | 33296778 | <b>rs2834061</b>    | G  | -                      | 0.249 | 0.291 | 1.24 | 0.000076  | 0.311 | 1.36 | 0.0000094            | 0.271 | 1.12 | 0.15   |
| C21 | 39373432 | <b>rs369906</b>     | T  | -                      | 0.566 | 0.613 | 1.21 | 0.00010   | 0.631 | 1.31 | 0.000028             | 0.587 | 1.09 | 0.24   |

| Gene |           |                   |   |                         |       |       |      |         |       |      |        |       |      |        |
|------|-----------|-------------------|---|-------------------------|-------|-------|------|---------|-------|------|--------|-------|------|--------|
| C03  | 69453958  | <b>rs10510980</b> | A | ENST00000343145 (K211R) | 0.808 | 0.840 | 1.25 | 0.00065 | 0.836 | 1.22 | 0.019  | 0.845 | 1.30 | 0.0061 |
| C08  | 118141371 | <b>rs13266634</b> | C | SLC30A8 (R325W)         | 0.646 | 0.685 | 1.19 | 0.00060 | 0.678 | 1.16 | 0.030  | 0.697 | 1.26 | 0.0020 |
| C10  | 124472418 | <b>rs2495774</b>  | G | LOC390009 (Q27H)        | 0.547 | 0.594 | 1.21 | 0.00011 | 0.592 | 1.20 | 0.0039 | 0.597 | 1.22 | 0.0043 |
| C11  | 3624302   | <b>rs2271586</b>  | T | ART5 (T284K)            | 0.176 | 0.208 | 1.23 | 0.00059 | 0.212 | 1.26 | 0.0033 | 0.203 | 1.20 | 0.042  |
| C19  | 8669900   | <b>rs10410943</b> | G | MGC33407 (A51V)         | 0.674 | 0.714 | 1.20 | 0.00043 | 0.713 | 1.20 | 0.0076 | 0.708 | 1.17 | 0.035  |

<sup>a</sup>A surrogate of the corresponding two marker haplotype with a correlation coefficient  $r^2$ . <sup>b</sup> $P$  values adjusted for relatedness and population stratification using genomic control (see **Methods**).
