# Supplementary material for: A variant in CDKAL1 influences insulin response and risk of type 2 diabetes
Source: Springer Nature journal article supplement (doi:10.1038/ng2043), 2007-04-26
Supplement: 41588_2007_BFng2043_MOESM66_ESM.pdf [file 41588_2007_BFng2043_MOESM66_ESM.pdf]

## Supplementary Table 2: Association to T2D in the primary replication group (Denmark B).

Association results for the 47 SNPs tested in the primary replication cohort (Denmark B), consisting of 1110 T2D cases and 2272 controls. Included in the table is the chromosome, the position of the SNPs in NCBI Build 34, the marker and allele tested, frequency in controls and the frequency in cases, odds ratio (OR) and *P* value in all T2D cases, non-obese T2D cases and obese T2D cases, respectively. For all three groups of cases, the same group of controls is used and the number of cases is included in the parentheses. The two SNPs selected for replication in additional T2D case-control groups are highlighted with bold typesetting.

| Chr | Position  | Marker            | Allele | Con.frq | All T2D cases (1110) |      |                | NonObese T2D cases (640) |      |               | Obese T2D cases (470) |      |               |
|-----|-----------|-------------------|--------|---------|----------------------|------|----------------|--------------------------|------|---------------|-----------------------|------|---------------|
|     |           |                   |        |         | Case.frq             | OR   | <i>P</i>       | Case.frq                 | OR   | <i>P</i>      | Case.frq              | OR   | <i>P</i>      |
| C01 | 29589307  | rs10798895        | A      | 0.832   | 0.828                | 0.97 | 0.68           | 0.831                    | 0.99 | 0.94          | 0.824                 | 0.94 | 0.55          |
| C01 | 104461151 | rs7553985         | C      | 0.367   | 0.379                | 1.05 | 0.34           | 0.375                    | 1.03 | 0.62          | 0.385                 | 1.08 | 0.30          |
| C01 | 151915609 | rs3738028         | G      | 0.385   | 0.410                | 1.11 | 0.050          | 0.419                    | 1.15 | 0.029         | 0.397                 | 1.05 | 0.47          |
| C02 | 40623619  | rs13414307        | A      | 0.537   | 0.540                | 1.01 | 0.84           | 0.544                    | 1.03 | 0.67          | 0.534                 | 0.99 | 0.86          |
| C03 | 69453958  | rs10510980        | A      | 0.826   | 0.833                | 1.05 | 0.50           | 0.835                    | 1.06 | 0.50          | 0.831                 | 1.03 | 0.74          |
| C03 | 89162181  | rs12486049        | T      | 0.878   | 0.872                | 0.94 | 0.47           | 0.871                    | 0.93 | 0.49          | 0.873                 | 0.96 | 0.70          |
| C03 | 146863467 | rs7630694         | G      | 0.053   | 0.054                | 1.02 | 0.85           | 0.051                    | 0.95 | 0.72          | 0.059                 | 1.12 | 0.46          |
| C03 | 196904151 | rs9858622         | A      | 0.656   | 0.667                | 1.05 | 0.39           | 0.662                    | 1.02 | 0.73          | 0.674                 | 1.08 | 0.29          |
| C04 | 140660180 | rs10033117        | C      | 0.740   | 0.746                | 1.03 | 0.65           | 0.747                    | 1.04 | 0.65          | 0.744                 | 1.02 | 0.81          |
| C05 | 76635083  | rs4704400         | T      | 0.472   | 0.456                | 0.94 | 0.23           | 0.452                    | 0.92 | 0.22          | 0.461                 | 0.96 | 0.55          |
| C05 | 87825021  | rs10452479        | G      | 0.229   | 0.238                | 1.05 | 0.43           | 0.240                    | 1.06 | 0.43          | 0.235                 | 1.04 | 0.68          |
| C06 | 6971276   | rs12201780        | A      | 0.043   | 0.048                | 1.12 | 0.36           | 0.049                    | 1.16 | 0.32          | 0.045                 | 1.07 | 0.71          |
| C06 | 9509965   | rs214447          | T      | 0.418   | 0.427                | 1.03 | 0.52           | 0.432                    | 1.06 | 0.39          | 0.419                 | 1.00 | 0.95          |
| C06 | 20787688  | <b>rs7756992</b>  | G      | 0.276   | 0.322                | 1.24 | <b>0.00013</b> | 0.321                    | 1.24 | <b>0.0021</b> | 0.323                 | 1.25 | <b>0.0044</b> |
| C06 | 31552682  | rs2516424         | C      | 0.363   | 0.380                | 1.07 | 0.19           | 0.374                    | 1.05 | 0.48          | 0.387                 | 1.11 | 0.18          |
| C06 | 41130207  | rs10456499        | A      | 0.581   | 0.579                | 0.99 | 0.92           | 0.576                    | 0.98 | 0.78          | 0.583                 | 1.01 | 0.87          |
| C06 | 132361238 | rs9483377         | G      | 0.306   | 0.331                | 1.12 | 0.039          | 0.334                    | 1.14 | 0.061         | 0.327                 | 1.10 | 0.20          |
| C06 | 150399255 | rs11155700        | A      | 0.758   | 0.734                | 0.88 | 0.043          | 0.737                    | 0.90 | 0.14          | 0.731                 | 0.87 | 0.089         |
| C06 | 164425224 | rs10085202        | G      | 0.430   | 0.426                | 0.99 | 0.78           | 0.424                    | 0.98 | 0.73          | 0.428                 | 0.99 | 0.94          |
| C08 | 118141371 | <b>rs13266634</b> | C      | 0.664   | 0.704                | 1.20 | <b>0.0012</b>  | 0.701                    | 1.19 | <b>0.013</b>  | 0.707                 | 1.22 | <b>0.012</b>  |
| C08 | 124084183 | rs952656          | G      | 0.672   | 0.672                | 1.00 | 0.98           | 0.680                    | 1.04 | 0.56          | 0.660                 | 0.95 | 0.51          |
| C08 | 128250055 | rs185852          | G      | 0.796   | 0.797                | 1.01 | 0.92           | 0.794                    | 0.99 | 0.88          | 0.801                 | 1.03 | 0.72          |
| C09 | 88426790  | rs10993008        | A      | 0.146   | 0.150                | 1.03 | 0.66           | 0.151                    | 1.04 | 0.64          | 0.149                 | 1.02 | 0.84          |
| C09 | 93745181  | rs10985640        | G      | 0.430   | 0.434                | 1.01 | 0.78           | 0.421                    | 0.96 | 0.57          | 0.451                 | 1.09 | 0.25          |
| C09 | 93810412  | rs4743148         | G      | 0.382   | 0.381                | 1.00 | 0.94           | 0.370                    | 0.95 | 0.41          | 0.398                 | 1.07 | 0.39          |
| C09 | 124790974 | rs3814120         | T      | 0.089   | 0.090                | 1.02 | 0.84           | 0.076                    | 0.85 | 0.16          | 0.109                 | 1.27 | 0.052         |
| C10 | 52758344  | rs12247188        | T      | 0.331   | 0.315                | 0.93 | 0.19           | 0.312                    | 0.92 | 0.22          | 0.318                 | 0.94 | 0.45          |

|     |           |            |   |       |       |      |       |       |      |       |       |      |      |
|-----|-----------|------------|---|-------|-------|------|-------|-------|------|-------|-------|------|------|
| C10 | 94047527  | rs7914814  | T | 0.413 | 0.432 | 1.08 | 0.14  | 0.434 | 1.09 | 0.18  | 0.429 | 1.07 | 0.35 |
| C10 | 118555280 | rs10787760 | G | 0.294 | 0.276 | 0.91 | 0.15  | 0.268 | 0.88 | 0.080 | 0.288 | 0.97 | 0.73 |
| C10 | 124472418 | rs2495774  | G | 0.524 | 0.540 | 1.07 | 0.22  | 0.542 | 1.07 | 0.27  | 0.538 | 1.06 | 0.46 |
| C11 | 23946882  | rs1879230  | T | 0.127 | 0.115 | 0.89 | 0.13  | 0.118 | 0.91 | 0.36  | 0.110 | 0.85 | 0.14 |
| C11 | 3624302   | rs2271586  | T | 0.190 | 0.201 | 1.07 | 0.28  | 0.194 | 1.02 | 0.77  | 0.211 | 1.14 | 0.13 |
| C11 | 106474406 | rs1455593  | T | 0.081 | 0.080 | 0.98 | 0.81  | 0.081 | 0.99 | 0.92  | 0.078 | 0.96 | 0.77 |
| C12 | 30434349  | rs794598   | T | 0.623 | 0.600 | 0.91 | 0.063 | 0.594 | 0.88 | 0.058 | 0.608 | 0.94 | 0.37 |
| C12 | 33373479  | rs1905421  | T | 0.099 | 0.097 | 0.98 | 0.79  | 0.086 | 0.85 | 0.17  | 0.113 | 1.16 | 0.24 |
| C14 | 80763881  | rs2066041  | G | 0.427 | 0.415 | 0.95 | 0.35  | 0.427 | 1.00 | 1.00  | 0.398 | 0.89 | 0.11 |
| C15 | 98060278  | rs2045107  | G | 0.524 | 0.527 | 1.01 | 0.78  | 0.522 | 0.99 | 0.92  | 0.534 | 1.04 | 0.55 |
| C16 | 12756032  | rs6498353  | C | 0.136 | 0.134 | 0.98 | 0.80  | 0.140 | 1.04 | 0.68  | 0.124 | 0.90 | 0.35 |
| C16 | 22764405  | rs724466   | T | 0.695 | 0.715 | 1.10 | 0.085 | 0.719 | 1.12 | 0.10  | 0.710 | 1.08 | 0.34 |
| C16 | 24356412  | rs11644596 | G | 0.324 | 0.323 | 1.00 | 0.94  | 0.336 | 1.06 | 0.43  | 0.305 | 0.92 | 0.27 |
| C16 | 73314817  | rs4887826  | G | 0.064 | 0.052 | 0.82 | 0.068 | 0.054 | 0.84 | 0.21  | 0.050 | 0.78 | 0.11 |
| C17 | 69203439  | rs1860316  | A | 0.679 | 0.682 | 1.01 | 0.82  | 0.684 | 1.02 | 0.74  | 0.679 | 1.00 | 1.00 |
| C18 | 41051796  | rs10502860 | G | 0.222 | 0.197 | 0.86 | 0.044 | 0.198 | 0.87 | 0.12  | 0.196 | 0.86 | 0.13 |
| C18 | 63463071  | rs7237209  | C | 0.861 | 0.852 | 0.92 | 0.29  | 0.848 | 0.89 | 0.22  | 0.857 | 0.97 | 0.74 |
| C19 | 3316583   | rs3810420  | A | 0.181 | 0.191 | 1.07 | 0.30  | 0.188 | 1.05 | 0.54  | 0.195 | 1.10 | 0.30 |
| C20 | 37645161  | rs6127771  | C | 0.447 | 0.451 | 1.02 | 0.77  | 0.442 | 0.98 | 0.77  | 0.462 | 1.06 | 0.39 |
| C21 | 33296778  | rs2834061  | G | 0.250 | 0.255 | 1.03 | 0.66  | 0.267 | 1.09 | 0.23  | 0.239 | 0.94 | 0.48 |

---
