# Supplementary material for: A variant in CDKAL1 influences insulin response and risk of type 2 diabetes
Source: Springer Nature journal article supplement (doi:10.1038/ng2043), 2007-04-26
Supplement: 41588_2007_BFng2043_MOESM67_ESM.pdf [file 41588_2007_BFng2043_MOESM67_ESM.pdf]

**Supplementary Table 3: Association results for SNPs with reported association to T2D in Sladek et al.**

Shown are association results for T2D in the Icelandic study group for the eight SNPs identified by Sladek et al (*Nature* **445**, 881-5 (2007)) as being associated with T2D. For the Icelandic group the table includes the frequency in cases and controls, odds ratio (OR) and adjusted *P* value for five of the eight SNP's. Corresponding values are shown for the replication cohort used in Sladek et al. Three of the markers, rs1113132, rs11037909 and rs3740878, are not on the Illumina 300K chip; however, a surrogate SNP rs729287 which has a correlation  $r^2 = 1$  to rs11037909 and rs3740878 (based on HapMap CEU data) has been typed in the Icelandic study group and results for this marker are included in the table.

| Chr | Position  | Marker     | Allele | Icelandic study group |       |      |                       | Sladek et al |       |                 |                       | Neares gene      |
|-----|-----------|------------|--------|-----------------------|-------|------|-----------------------|--------------|-------|-----------------|-----------------------|------------------|
|     |           |            |        | Controls              | Cases | OR   | <i>P</i>              | Controls     | Cases | OR <sup>a</sup> | <i>P</i> <sup>b</sup> |                  |
| C08 | 118141371 | rs13266634 | C      | 0.646                 | 0.685 | 1.19 | 0.00060               | 0.699        | 0.746 | 1.26            | 5.0×10 <sup>-7</sup>  | <i>SLC30A8</i>   |
| C10 | 94127459  | rs1111875  | G      | 0.550                 | 0.588 | 1.17 | 0.0014                | 0.598        | 0.642 | 1.21            | 9.1×10 <sup>-6</sup>  | <i>HHEX</i>      |
| C10 | 94146494  | rs7923837  | G      | 0.583                 | 0.624 | 1.19 | 0.00058               | 0.623        | 0.665 | 1.20            | 2.2×10 <sup>-5</sup>  | <i>HHEX</i>      |
| C10 | 114422936 | rs7903146  | T      | 0.300                 | 0.372 | 1.38 | 1.9×10 <sup>-10</sup> | 0.293        | 0.406 | 1.65            | <1.0×10 <sup>-7</sup> | <i>TCF7L2</i>    |
| C11 | 42211027  | rs7480010  | G      | 0.273                 | 0.271 | 0.95 | 0.33                  | 0.301        | 0.336 | 1.18            | 2.9×10 <sup>-4</sup>  | <i>LOC387761</i> |
| C11 | 44207712  | rs1113132  | C      | -                     | -     | -    | -                     | 0.733        | 0.763 | 1.17            | 8.1×10 <sup>-4</sup>  | <i>EXT2</i>      |
| C11 | 44219923  | rs11037909 | T      | -                     | -     | -    | -                     | 0.729        | 0.760 | 1.18            | 4.5×10 <sup>-4</sup>  | <i>EXT2</i>      |
| C11 | 44222111  | rs3740878  | A      | -                     | -     | -    | -                     | 0.728        | 0.760 | 1.18            | 2.8×10 <sup>-4</sup>  | <i>EXT2</i>      |
| C11 | 44244399  | rs729287   | C      | 0.748                 | 0.759 | 1.06 | 0.33                  | -            | -     | -               | -                     | <i>EXT2</i>      |

<sup>a</sup> Allelic OR calculated from frequency information provided in Table 1 of Sladek et al. <sup>b</sup> *P* value (based on permutation) for Stage 2 in Table 1 in Sladek et al.
