# Supplementary material for: A variant in CDKAL1 influences insulin response and risk of type 2 diabetes
Source: Springer Nature journal article supplement (doi:10.1038/ng2043), 2007-04-26
Supplement: 41588_2007_BFng2043_MOESM68_ESM.pdf [file 41588_2007_BFng2043_MOESM68_ESM.pdf]

**Supplementary Table 4a: Association of eight SNPs in *CDKAL1* to T2D in Iceland, Hong Kong and West-Africa.**

Association to T2D for eight SNPs in the *CDKAL1* gene for three of the seven study groups; from Iceland, Hong Kong and West-Africa. The seven additional SNPs are all highly correlated to rs7756992.

| SNP        | Allele | Position <sup>b</sup> | Combined <sup>a</sup> |                      |         | Iceland  |      |          | Hong Kong |          |      |                      | West-Africa <sup>c</sup> |          |      |          |
|------------|--------|-----------------------|-----------------------|----------------------|---------|----------|------|----------|-----------|----------|------|----------------------|--------------------------|----------|------|----------|
|            |        |                       | OR (95% CI)           | <i>P</i>             | Con.frq | Case.frq | OR   | <i>P</i> | Con.frq   | Case.frq | OR   | <i>P</i>             | Con.frq                  | Case.frq | OR   | <i>P</i> |
| rs7752906  | A      | 20774034              | 1.19 (1.11-1.28)      | 6.5×10 <sup>-7</sup> | 0.296   | 0.338    | 1.22 | 0.00076  | 0.362     | 0.422    | 1.29 | 3.2×10 <sup>-5</sup> | 0.654                    | 0.674    | 1.06 | 0.43     |
| rs1569699  | C      | 20787289              | 1.19 (1.12-1.27)      | 1.4×10 <sup>-7</sup> | 0.257   | 0.297    | 1.22 | 0.00018  | 0.463     | 0.519    | 1.25 | 0.00019              | 0.627                    | 0.656    | 1.10 | 0.17     |
| rs7756992  | G      | 20787688              | 1.17 (1.09-1.25)      | 3.1×10 <sup>-6</sup> | 0.232   | 0.270    | 1.23 | 0.00021  | 0.462     | 0.517    | 1.25 | 0.00018              | 0.612                    | 0.625    | 1.02 | 0.72     |
| rs9350271  | A      | 20791143              | 1.18 (1.11-1.26)      | 9.6×10 <sup>-7</sup> | 0.257   | 0.298    | 1.23 | 0.00016  | 0.356     | 0.406    | 1.23 | 0.00055              | 0.695                    | 0.712    | 1.07 | 0.38     |
| rs9356744  | C      | 20793465              | 1.18 (1.11-1.26)      | 7.9×10 <sup>-7</sup> | 0.256   | 0.297    | 1.23 | 0.00014  | 0.357     | 0.407    | 1.24 | 0.00045              | 0.696                    | 0.713    | 1.06 | 0.39     |
| rs9368222  | A      | 20794975              | 1.20 (1.12-1.28)      | 4.8×10 <sup>-7</sup> | 0.231   | 0.269    | 1.22 | 0.00029  | 0.355     | 0.405    | 1.24 | 0.00041              | 0.184                    | 0.203    | 1.10 | 0.27     |
| rs10440833 | A      | 20796100              | 1.18 (1.11-1.27)      | 1.4×10 <sup>-6</sup> | 0.233   | 0.269    | 1.22 | 0.00046  | 0.354     | 0.407    | 1.25 | 0.00024              | 0.213                    | 0.226    | 1.06 | 0.48     |
| rs6931514  | G      | 20811931              | 1.19 (1.11-1.27)      | 7.8×10 <sup>-7</sup> | 0.231   | 0.267    | 1.22 | 0.00047  | 0.464     | 0.520    | 1.25 | 0.00015              | 0.231                    | 0.249    | 1.07 | 0.41     |

<sup>a</sup>Results for the three groups were combined using a Mantel-Haenszel model. <sup>b</sup>Basepair position in NCBI Build 34. <sup>c</sup>Results for the five West-African groups were combined using Mantel-Haenszel model and the allele frequencies shown are a weighted average of the frequency for the five groups.

### Supplementary Table 4b: Pair-wise correlation for SNPs typed in CDKAL1.

Pair-wise correlation,  $D'$  (lower left corner) and  $r^2$  (upper right corner), for the eight SNPs in *CDKAL1* that were tested for association to T2D. The correlation is estimated for control individuals from the Icelandic, Hong Kong and West-African study groups, respectively.

| $D'$ / $r^2$       | rs7752906 | rs1569699 | rs7756992 | rs9350271 | rs9356744 | rs9368222 | rs10440833 | rs6931514 |
|--------------------|-----------|-----------|-----------|-----------|-----------|-----------|------------|-----------|
| <b>Iceland</b>     |           |           |           |           |           |           |            |           |
| rs7752906          | -         | 0.55      | 0.66      | 0.56      | 0.56      | 0.67      | 0.66       | 0.65      |
| rs1569699          | 0.83      | -         | 0.87      | 0.99      | 0.98      | 0.85      | 0.83       | 0.83      |
| rs7756992          | 0.98      | 1.00      | -         | 0.86      | 0.86      | 0.99      | 0.97       | 0.96      |
| rs9350271          | 0.84      | 1.00      | 1.00      | -         | 1.00      | 0.86      | 0.85       | 0.84      |
| rs9356744          | 0.84      | 1.00      | 1.00      | 1.00      | -         | 0.87      | 0.86       | 0.85      |
| rs9368222          | 0.99      | 1.00      | 1.00      | 1.00      | 1.00      | -         | 0.98       | 0.97      |
| rs10440833         | 0.96      | 0.97      | 1.00      | 0.98      | 0.99      | 1.00      | -          | 0.99      |
| rs6931514          | 0.96      | 0.97      | 0.99      | 0.98      | 0.99      | 0.99      | 1.00       | -         |
| <b>Hong Kong</b>   |           |           |           |           |           |           |            |           |
| rs7752906          | -         | 0.45      | 0.46      | 0.77      | 0.76      | 0.77      | 0.77       | 0.46      |
| rs1569699          | 0.84      | -         | 0.99      | 0.63      | 0.63      | 0.62      | 0.62       | 0.98      |
| rs7756992          | 0.84      | 1.00      | -         | 0.63      | 0.62      | 0.64      | 0.64       | 0.99      |
| rs9350271          | 0.89      | 1.00      | 0.99      | -         | 1.00      | 0.99      | 0.99       | 0.62      |
| rs9356744          | 0.88      | 0.99      | 0.99      | 1.00      | -         | 0.99      | 0.99       | 0.62      |
| rs9368222          | 0.89      | 0.99      | 1.00      | 1.00      | 1.00      | -         | 1.00       | 0.63      |
| rs10440833         | 0.89      | 1.00      | 1.00      | 1.00      | 1.00      | 1.00      | -          | 0.63      |
| rs6931514          | 0.84      | 0.99      | 1.00      | 0.99      | 0.99      | 1.00      | 1.00       | -         |
| <b>West-Africa</b> |           |           |           |           |           |           |            |           |
| rs7752906          | -         | 0.16      | 0.32      | 0.13      | 0.14      | 0.12      | 0.07       | 0.08      |
| rs1569699          | 0.42      | -         | 0.61      | 0.72      | 0.72      | 0.12      | 0.07       | 0.09      |
| rs7756992          | 0.62      | 0.84      | -         | 0.67      | 0.67      | 0.14      | 0.08       | 0.10      |
| rs9350271          | 0.40      | 0.96      | 0.99      | -         | 0.99      | 0.10      | 0.04       | 0.05      |
| rs9356744          | 0.41      | 0.96      | 1.00      | 1.00      | -         | 0.10      | 0.04       | 0.06      |
| rs9368222          | 1.00      | 0.96      | 0.95      | 1.00      | 1.00      | -         | 0.86       | 0.76      |
| rs10440833         | 0.68      | 0.68      | 0.68      | 0.59      | 0.60      | 1.00      | -          | 0.87      |
| rs6931514          | 0.73      | 0.72      | 0.73      | 0.63      | 0.65      | 0.99      | 1.00       | -         |
