# Supplementary material for: A variant in CDKAL1 influences insulin response and risk of type 2 diabetes
Source: Springer Nature journal article supplement (doi:10.1038/ng2043), 2007-04-26
Supplement: 41588_2007_BFng2043_MOESM69_ESM.pdf [file 41588_2007_BFng2043_MOESM69_ESM.pdf]

### Supplementary Table 5: Association to T2D for 61 SNP in CDKAL1.

Shown is the association to T2D for 61 SNP located in the same LD-block (position 20.635 to 20.84 Mb in NCBI Build 34) as rs7756992. Results are shown for the 1399 T2D cases and 5275 controls in the Icelandic discovery group. Also included are the corresponding results if the association test is done adjusting for the observed association to rs7756992 and the correlation  $r^2$  between rs7756992 and each SNP estimated for the Icelandic control group.

| SNP        | Allele | Position | Frequency |          | OR   | $P^a$   | Adjusted for rs7756992 <sup>b</sup> |       |       |
|------------|--------|----------|-----------|----------|------|---------|-------------------------------------|-------|-------|
|            |        |          | Cases     | Controls |      |         | OR                                  | $P$   | $r^2$ |
| rs4429936  | T      | 20634996 | 0.499     | 0.461    | 1.16 | 0.052   | 1.12                                | 0.16  | 0.01  |
| rs7772956  | T      | 20637521 | 0.112     | 0.105    | 1.08 | 0.34    | 0.90                                | 0.26  | 0.28  |
| rs6909467  | C      | 20641141 | 0.670     | 0.667    | 1.01 | 0.81    | 0.94                                | 0.23  | 0.13  |
| rs981043   | G      | 20643397 | 0.916     | 0.916    | 1.00 | 0.99    | 1.18                                | 0.075 | 0.20  |
| rs2179550  | G      | 20644727 | 0.579     | 0.562    | 1.07 | 0.39    | 1.11                                | 0.18  | 0.00  |
| rs2328525  | G      | 20645431 | 0.247     | 0.234    | 1.08 | 0.19    | 1.01                                | 0.84  | 0.09  |
| rs12200871 | T      | 20649085 | 0.119     | 0.102    | 1.19 | 0.024   | 1.13                                | 0.10  | 0.03  |
| rs9348432  | T      | 20649159 | 0.325     | 0.309    | 1.08 | 0.15    | 0.95                                | 0.44  | 0.30  |
| rs7758851  | G      | 20650200 | 0.711     | 0.685    | 1.13 | 0.021   | 1.06                                | 0.27  | 0.12  |
| rs9366354  | G      | 20653447 | 0.385     | 0.355    | 1.14 | 0.0095  | 1.00                                | 0.98  | 0.48  |
| rs7756211  | G      | 20661764 | 0.712     | 0.685    | 1.13 | 0.018   | 1.07                                | 0.25  | 0.12  |
| rs6918457  | A      | 20674435 | 0.732     | 0.726    | 1.03 | 0.59    | 0.96                                | 0.48  | 0.10  |
| rs6905281  | G      | 20679114 | 0.091     | 0.085    | 1.07 | 0.61    | 1.23                                | 0.14  | 0.03  |
| rs962576   | C      | 20682568 | 0.239     | 0.212    | 1.17 | 0.073   | 1.00                                | 0.96  | 0.10  |
| rs6907767  | G      | 20697320 | 0.338     | 0.331    | 1.03 | 0.53    | 1.07                                | 0.21  | 0.02  |
| rs13212326 | A      | 20706282 | 0.059     | 0.044    | 1.37 | 0.0038  | 1.20                                | 0.12  | 0.15  |
| rs2294809  | A      | 20707867 | 0.214     | 0.200    | 1.09 | 0.17    | 1.02                                | 0.81  | 0.09  |
| rs7758129  | G      | 20717220 | 0.378     | 0.372    | 1.02 | 0.77    | 1.05                                | 0.52  | 0.00  |
| rs9465831  | G      | 20719905 | 0.752     | 0.748    | 1.02 | 0.72    | 0.95                                | 0.38  | 0.10  |
| rs9350268  | G      | 20727982 | 0.276     | 0.264    | 1.07 | 0.24    | 1.03                                | 0.65  | 0.04  |
| rs2069013  | G      | 20728095 | 0.030     | 0.029    | 1.02 | 0.91    | 1.07                                | 0.64  | 0.01  |
| rs1569660  | G      | 20730732 | 0.498     | 0.473    | 1.11 | 0.20    | 1.07                                | 0.37  | 0.01  |
| rs7763304  | T      | 20732013 | 0.165     | 0.163    | 1.01 | 0.87    | 1.08                                | 0.27  | 0.05  |
| rs11756987 | A      | 20733430 | 0.033     | 0.036    | 0.92 | 0.72    | 1.06                                | 0.78  | 0.01  |
| rs6917599  | A      | 20734388 | 0.557     | 0.542    | 1.06 | 0.22    | 1.05                                | 0.31  | 0.01  |
| rs13194407 | T      | 20738932 | 0.155     | 0.126    | 1.27 | 0.027   | 1.09                                | 0.43  | 0.06  |
| rs10484633 | A      | 20738990 | 0.861     | 0.855    | 1.05 | 0.48    | 0.99                                | 0.93  | 0.04  |
| rs2328529  | A      | 20739932 | 0.149     | 0.141    | 1.07 | 0.29    | 0.96                                | 0.63  | 0.16  |
| rs17224527 | T      | 20740745 | 0.715     | 0.667    | 1.25 | 0.0038  | 1.10                                | 0.27  | 0.12  |
| rs17823073 | A      | 20741024 | 0.160     | 0.143    | 1.15 | 0.18    | 0.98                                | 0.89  | 0.09  |
| rs7755830  | T      | 20742865 | 0.567     | 0.523    | 1.20 | 0.0088  | 1.03                                | 0.75  | 0.21  |
| rs9465851  | T      | 20748295 | 0.671     | 0.678    | 0.97 | 0.71    | 1.02                                | 0.77  | 0.01  |
| rs2328531  | A      | 20751731 | 0.340     | 0.322    | 1.08 | 0.131   | 1.06                                | 0.25  | 0.01  |
| rs10484632 | A      | 20755639 | 0.248     | 0.231    | 1.10 | 0.101   | 1.00                                | 0.96  | 0.20  |
| rs11965062 | T      | 20755941 | 0.596     | 0.542    | 1.25 | 0.0011  | 1.10                                | 0.26  | 0.22  |
| rs9295475  | G      | 20760744 | 0.143     | 0.123    | 1.18 | 0.0164  | 1.06                                | 0.45  | 0.22  |
| rs4712523  | G      | 20765543 | 0.330     | 0.296    | 1.17 | 0.0020  | 1.02                                | 0.82  | 0.67  |
| rs6906327  | A      | 20767438 | 0.358     | 0.321    | 1.18 | 0.0013  | 1.05                                | 0.53  | 0.60  |
| rs7774594  | A      | 20769122 | 0.337     | 0.295    | 1.22 | 0.00065 | 1.01                                | 0.93  | 0.66  |
| rs2206740  | C      | 20769711 | 0.978     | 0.974    | 1.22 | 0.45    | 1.06                                | 0.83  | 0.00  |

|                  |          |                 |              |              |             |                |           |           |           |
|------------------|----------|-----------------|--------------|--------------|-------------|----------------|-----------|-----------|-----------|
| rs4712527        | G        | 20771314        | 0.236        | 0.235        | 1.00        | 0.99           | 1.08      | 0.21      | 0.09      |
| rs736425         | C        | 20772291        | 0.220        | 0.203        | 1.11        | 0.078          | 0.99      | 0.92      | 0.26      |
| rs7752906        | A        | 20774034        | 0.338        | 0.296        | 1.22        | 0.00076        | 1.00      | 0.97      | 0.66      |
| rs9358356        | C        | 20775361        | 0.337        | 0.295        | 1.22        | 0.00066        | 1.01      | 0.95      | 0.67      |
| rs9356743        | T        | 20775667        | 0.110        | 0.091        | 1.24        | 0.0067         | 1.07      | 0.46      | 0.32      |
| rs9350270        | G        | 20775778        | 0.118        | 0.098        | 1.24        | 0.038          | 0.89      | 0.43      | 0.35      |
| rs1569699        | C        | 20787289        | 0.297        | 0.257        | 1.22        | 0.00018        | 1.14      | 0.40      | 0.87      |
| <b>rs7756992</b> | <b>G</b> | <b>20787688</b> | <b>0.270</b> | <b>0.232</b> | <b>1.23</b> | <b>0.00021</b> | <b>na</b> | <b>na</b> | <b>na</b> |
| rs9350271        | A        | 20791143        | 0.298        | 0.257        | 1.23        | 0.00016        | 1.10      | 0.69      | 0.86      |
| rs9356744        | C        | 20793465        | 0.297        | 0.256        | 1.23        | 0.00014        | 1.15      | 0.55      | 0.86      |
| rs9368222        | A        | 20794975        | 0.269        | 0.231        | 1.22        | 0.00029        | 0.48      | 0.41      | 0.99      |
| rs10440833       | A        | 20796100        | 0.269        | 0.233        | 1.22        | 0.00046        | 0.31      | 0.052     | 0.97      |
| rs7748720        | A        | 20797924        | 0.748        | 0.743        | 1.03        | 0.62           | 0.95      | 0.43      | 0.10      |
| rs2206734        | A        | 20802863        | 0.174        | 0.142        | 1.27        | 0.00022        | 1.15      | 0.16      | 0.53      |
| rs6931514        | G        | 20811931        | 0.267        | 0.231        | 1.22        | 0.00047        | 0.48      | 0.14      | 0.96      |
| rs3749925        | C        | 20820440        | 0.864        | 0.853        | 1.09        | 0.42           | 0.94      | 0.60      | 0.05      |
| rs9295478        | A        | 20824232        | 0.201        | 0.167        | 1.26        | 0.00021        | 1.15      | 0.091     | 0.42      |
| rs13216165       | A        | 20825100        | 0.581        | 0.555        | 1.11        | 0.18           | 1.08      | 0.36      | 0.00      |
| rs6928012        | C        | 20836492        | 0.437        | 0.400        | 1.16        | 0.046          | 1.05      | 0.51      | 0.05      |
| rs6908425        | C        | 20836710        | 0.747        | 0.746        | 1.01        | 0.91           | 0.93      | 0.25      | 0.10      |
| rs7741604        | C        | 20839503        | 0.123        | 0.106        | 1.18        | 0.030          | 1.06      | 0.47      | 0.16      |

<sup>a</sup> *P* value adjusted using genomic controls. <sup>b</sup> *P* value and OR adjusted for the observed association to rs7756992 and the correlation ( $r^2$ ) between rs7756992 and the SNPs.
