# Supplementary material for: A variant in CDKAL1 influences insulin response and risk of type 2 diabetes
Source: Springer Nature journal article supplement (doi:10.1038/ng2043), 2007-04-26
Supplement: 41588_2007_BFng2043_MOESM71_ESM.pdf [file 41588_2007_BFng2043_MOESM71_ESM.pdf]

### Supplementary Table 7: Characteristics of the T2D case control groups.

Characteristics of the seven T2D case-controls groups used in the paper. The table includes the number of males and females, mean age, mean BMI and mean age of diagnosis (Aod) for the T2D cases and the controls separately. As information on BMI and age of diagnosis is not available for all study participants, the number of individuals for whom this information is available is included in parenthesis. Note that no information is available on BMI for the controls from the Netherlands, and information on age of diagnosis is not available for the T2D cases from Denmark A, Philadelphia and from West-Africa.

| Study population       | Males/Females | Mean Age $\pm$ SD | Mean BMI $\pm$ SD ( <i>n</i> ) <sup>a</sup> | Mean Aod $\pm$ SD ( <i>n</i> ) <sup>a</sup> |
|------------------------|---------------|-------------------|---------------------------------------------|---------------------------------------------|
| <b>Iceland</b>         |               |                   |                                             |                                             |
| T2D                    | 832/567       | 64.4 $\pm$ 12.8   | 29.8 $\pm$ 5.4 (1231)                       | 56.2 $\pm$ 12.3 (688)                       |
| Controls               | 2743/2532     | 58.3 $\pm$ 17.4   | 27.1 $\pm$ 4.9 (1751)                       |                                             |
| <b>Denmark A</b>       |               |                   |                                             |                                             |
| T2D                    | 0/263         | 65.5 $\pm$ 7.0    | 28.3 $\pm$ 4.1 (263)                        | na                                          |
| Controls               | 0/597         | 64.4 $\pm$ 8.5    | 25.2 $\pm$ 3.7 (596)                        |                                             |
| <b>Denmark B</b>       |               |                   |                                             |                                             |
| T2D                    | 821/538       | 56.8 $\pm$ 10.5   | 29.7 $\pm$ 5.3 (1343)                       | 52.1 $\pm$ 10.3 (1013)                      |
| Controls               | 2249/2576     | 46.4 $\pm$ 8.8    | 25.5 $\pm$ 4.1 (4824)                       |                                             |
| <b>Philadelphia</b>    |               |                   |                                             |                                             |
| T2D                    | 288/159       | 64.3 $\pm$ 10.7   | 30.3 $\pm$ 5.8 (380)                        | na                                          |
| Controls               | 629/321       | 61.7 $\pm$ 12.2   | 28.1 $\pm$ 4.8 (861)                        |                                             |
| <b>The Netherlands</b> |               |                   |                                             |                                             |
| T2D                    | 169/199       | 71.2 $\pm$ 9.9    | 27.8 $\pm$ 4.2 (363)                        | 63.2 $\pm$ 11.5 (356)                       |
| Controls <sup>b</sup>  | 553/353       | 47.7 $\pm$ 12.7   | na                                          |                                             |
| <b>Hong Kong</b>       |               |                   |                                             |                                             |
| T2D                    | 588/869       | 49.8 $\pm$ 13.7   | 25.1 $\pm$ 4.1 (1451)                       | 43.8 $\pm$ 13.7 (1443)                      |
| Controls               | 418/568       | 32.0 $\pm$ 14.3   | 21.8 $\pm$ 3.5 (979)                        |                                             |
| <b>West Africa</b>     |               |                   |                                             |                                             |
| T2D                    | 345/520       | 53.5 $\pm$ 10.6   | 26.6 $\pm$ 5.5 (862)                        | na                                          |
| Controls               | 471/635       | 42.4 $\pm$ 15.5   | 25.2 $\pm$ 5.9 (1091)                       |                                             |

<sup>a</sup> The number in parenthesis (*n*) indicates the number of individuals for which information on BMI or age of diagnosis is available. <sup>b</sup> Information on gender is missing for 9 of the controls from the Netherlands.
